# Supplementary material for: Patterns and Direct/Indirect Signaling Pathways in Cardiovascular System in the Condition of Transient Increase of NO
Source: Hindawi journal article supplement (doi:10.1155/2020/6578213), 2020-01-01
Supplement: f1 [file 6578213.f1.pdf]

**BioMed Research International**

**Supplementary Data**

to

**Patterns and direct/indirect signaling pathways in cardiovascular system in the condition of transient increase of NO**

Anton Misak,<sup>1</sup> Lucia Kurakova,<sup>1,2</sup> Andrea Berenyiova,<sup>3</sup> Lenka Tomasova,<sup>1</sup> Marian Grman,<sup>1</sup> Sona Cacanyiova,<sup>3</sup> Karol Ondrias<sup>1</sup>

<sup>1</sup>Institute of Clinical and Translational Research, Biomedical Research Center, Slovak Academy of Sciences, Dubravska cesta 9, 845 05 Bratislava, Slovakia

<sup>2</sup>Department of Pharmacology and Toxicology, Faculty of Pharmacy, Comenius University, Odbojarov 10, 832 32 Bratislava, Slovakia

<sup>3</sup>Institute of Normal and Pathological Physiology, Centre of Experimental Medicine, Slovak Academy of Sciences, Dubravska cesta 9, 841 04 Bratislava, Slovakia

Correspondence should be addressed to Karol Ondrias, [karol.ondrias@savba.sk](mailto:karol.ondrias@savba.sk)

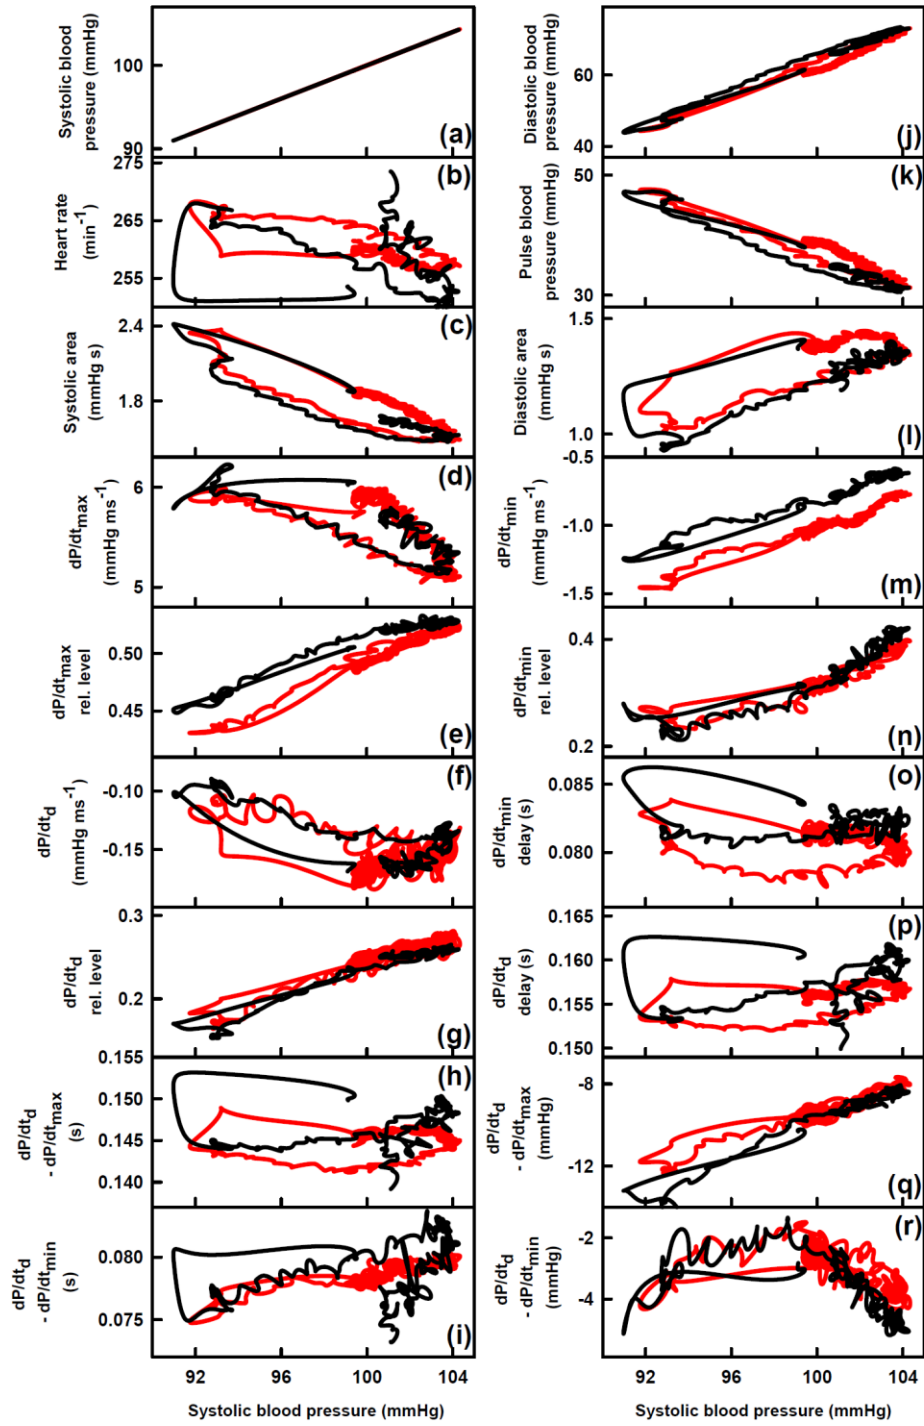

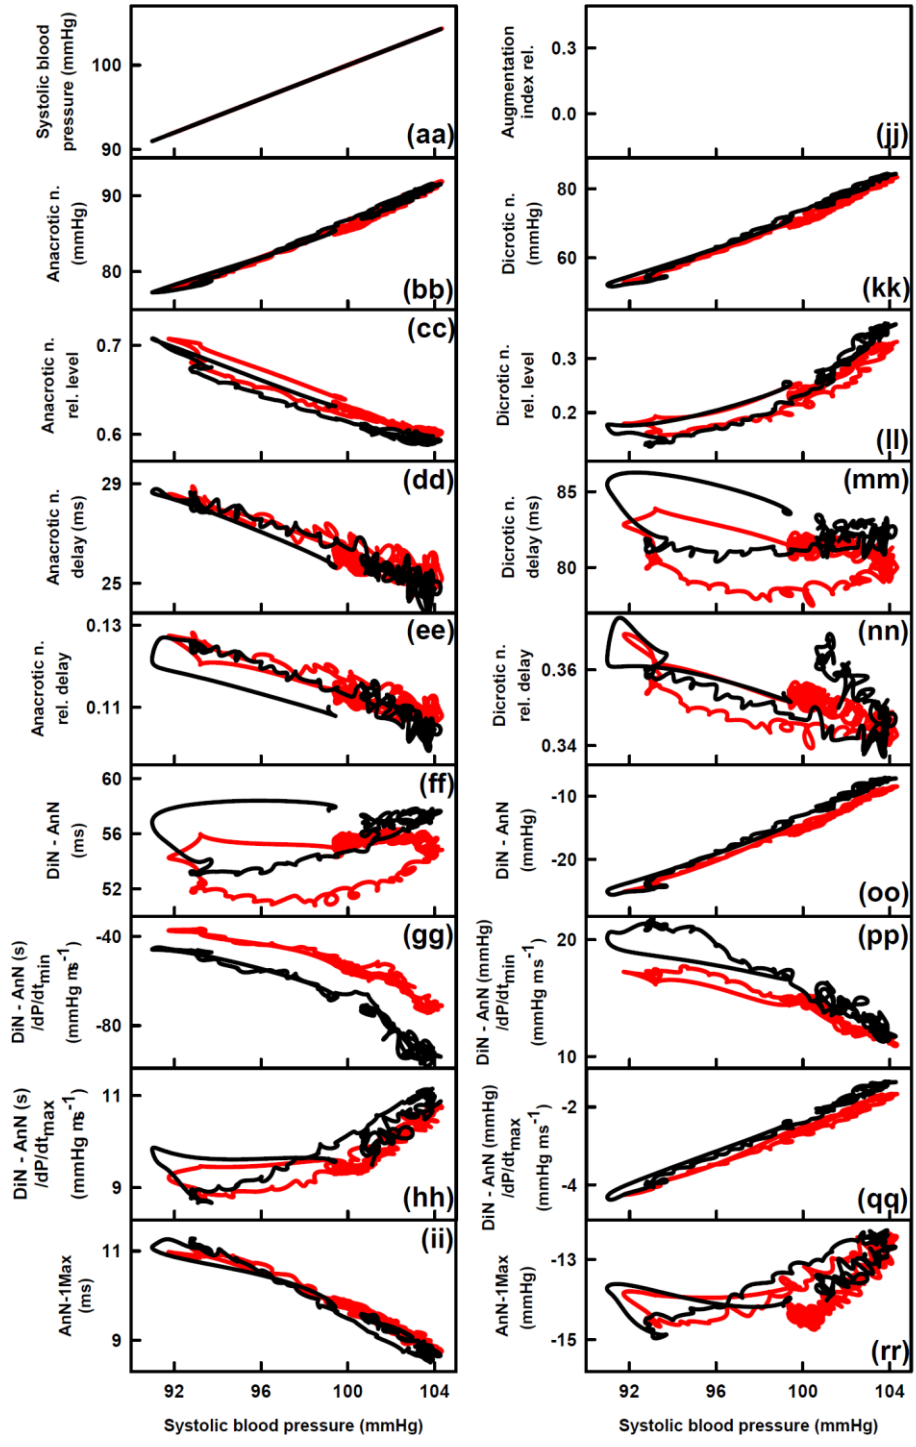

**Figure S1** Relationships of HPs to systolic BP after the first and the fourth administration of 32 nmol kg<sup>-1</sup> GSNO. The data and colours were taken from Figure 2A.

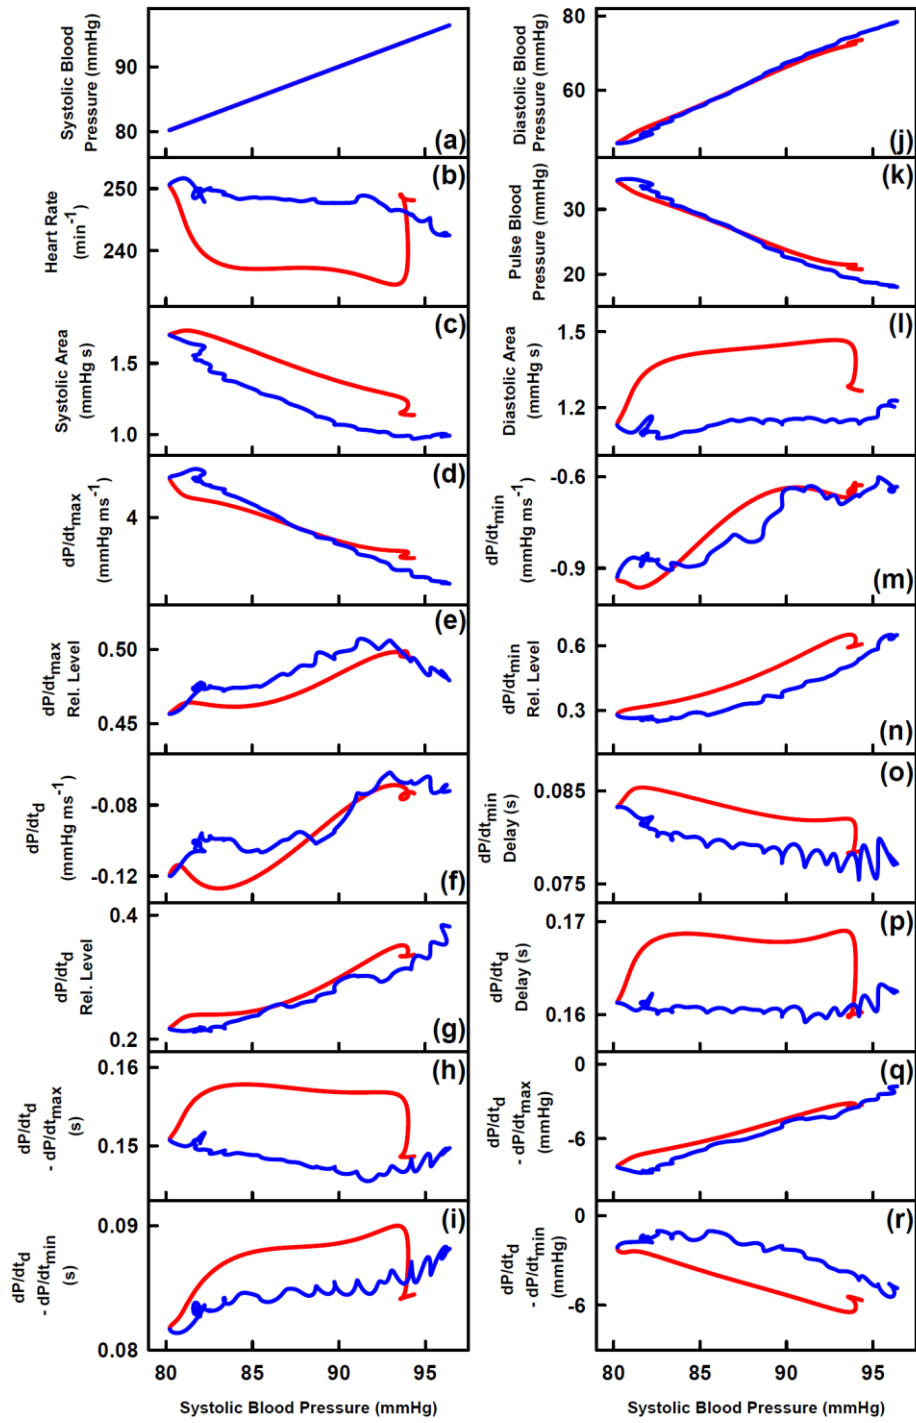

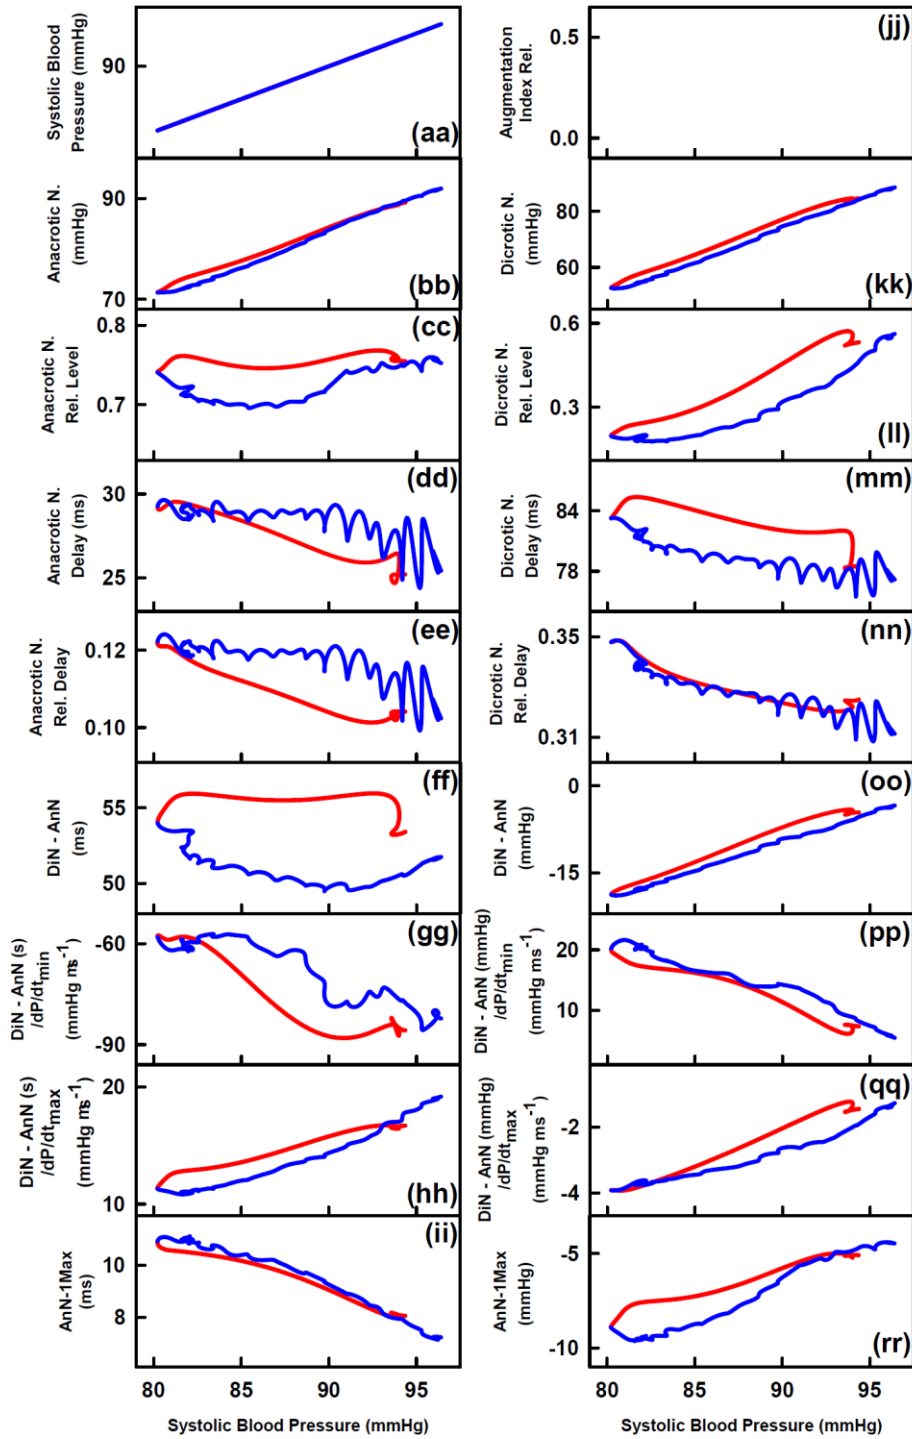

**Figure S2A** Relationships of HPs to systolic BP after administrations of  $32 \text{ nmol kg}^{-1}$  GSNO. The red line represents the decrease of the systolic BP from the control BP to the lowest BP and blue line represents the increase of the systolic BP from the lowest systolic BP to the control systolic BP (Figure 3A(a) or 3A(aa)).

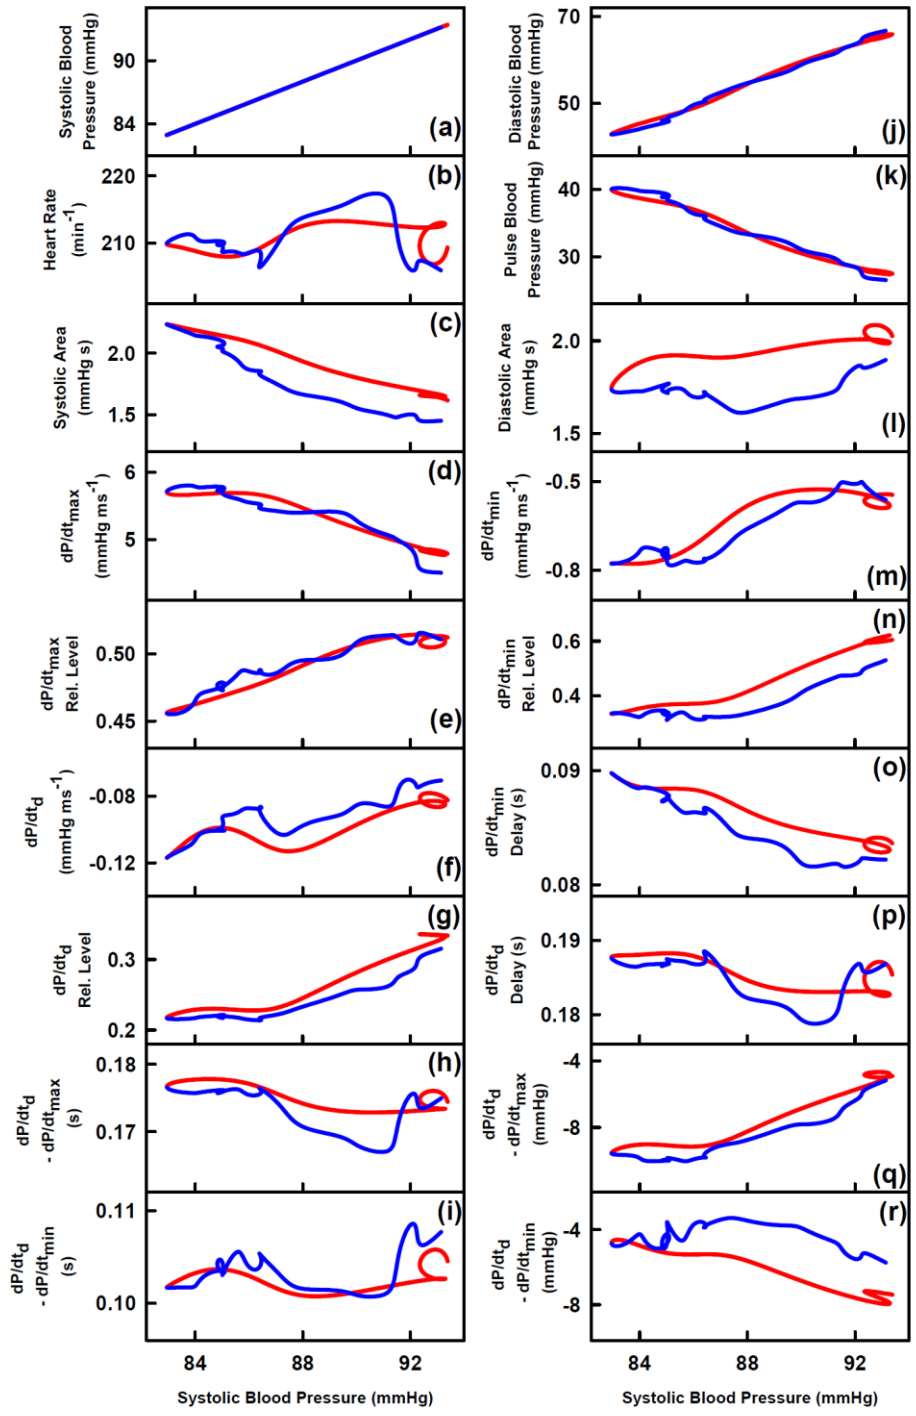

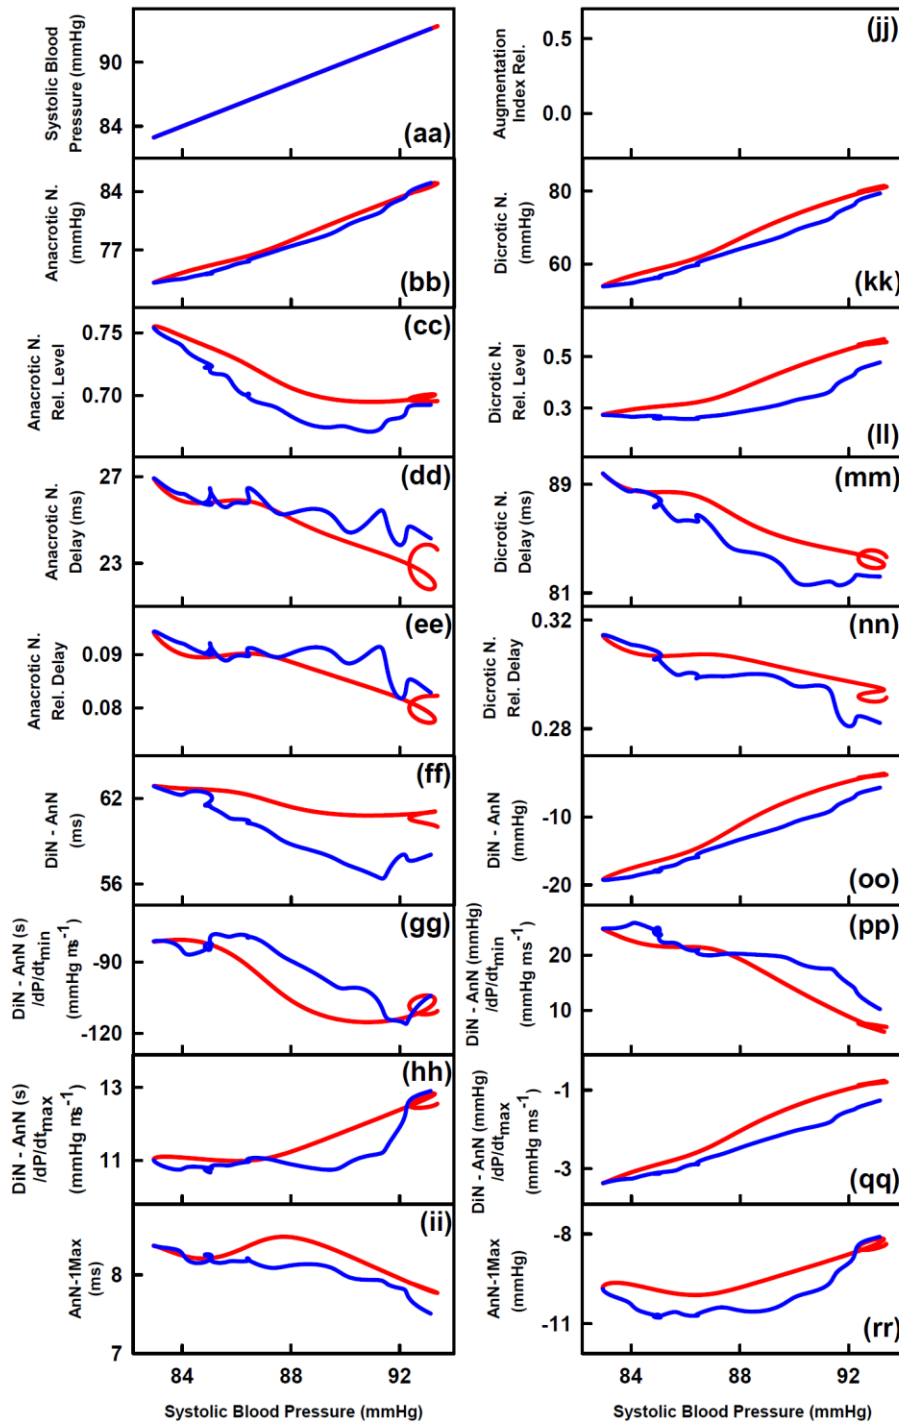

**Figure S2B** Relationships of HPs to systolic BP after administrations of  $32 \text{ nmol kg}^{-1}$  GSNO. The red line represents the decrease of the systolic BP from the control BP to the lowest BP and blue line represents the increase of the systolic BP from the lowest systolic BP to the control systolic BP (Figure 3A(a) or 3A(aa)).

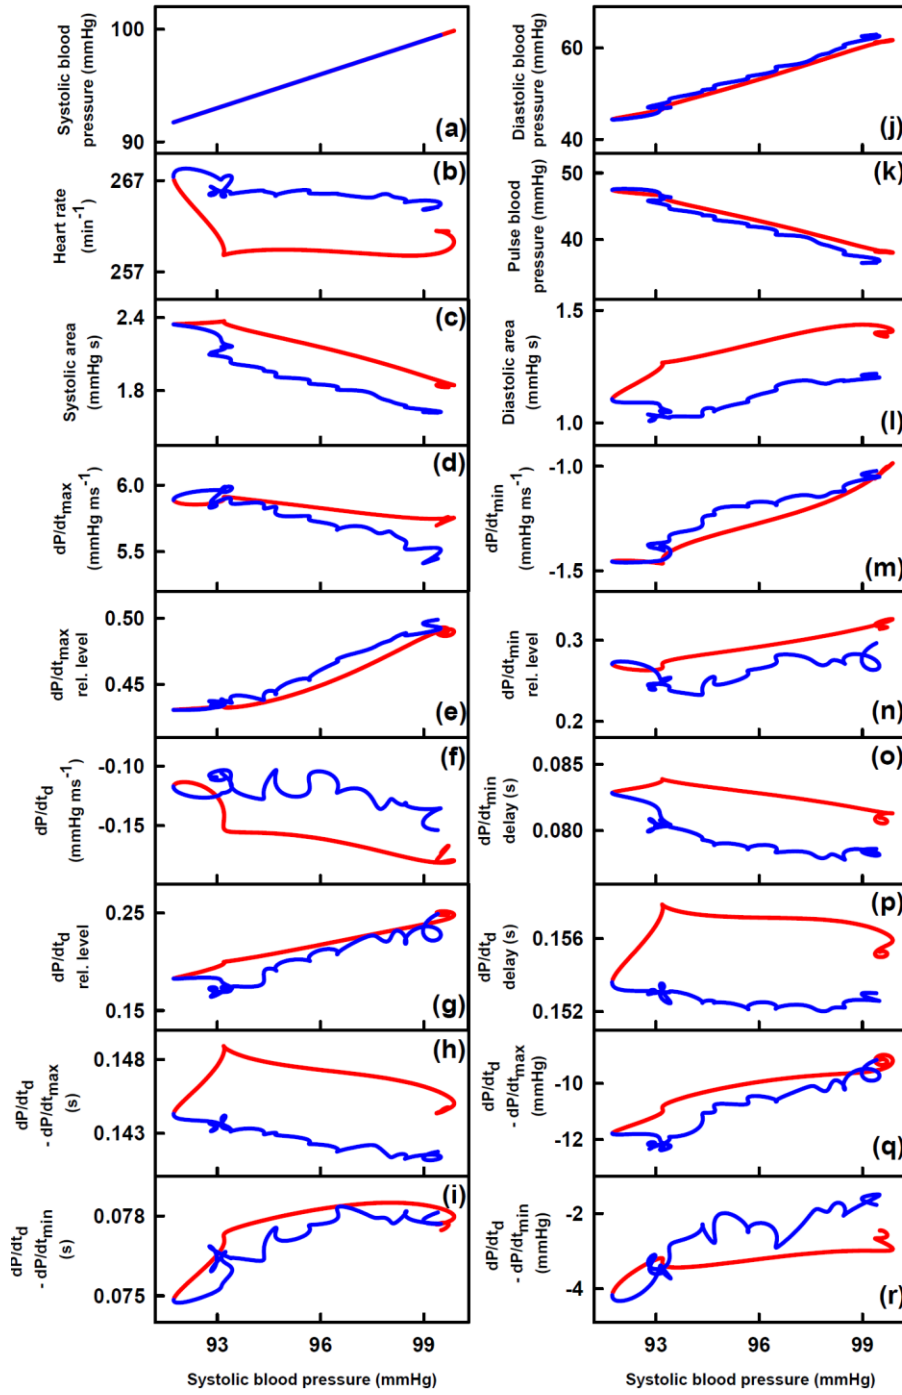



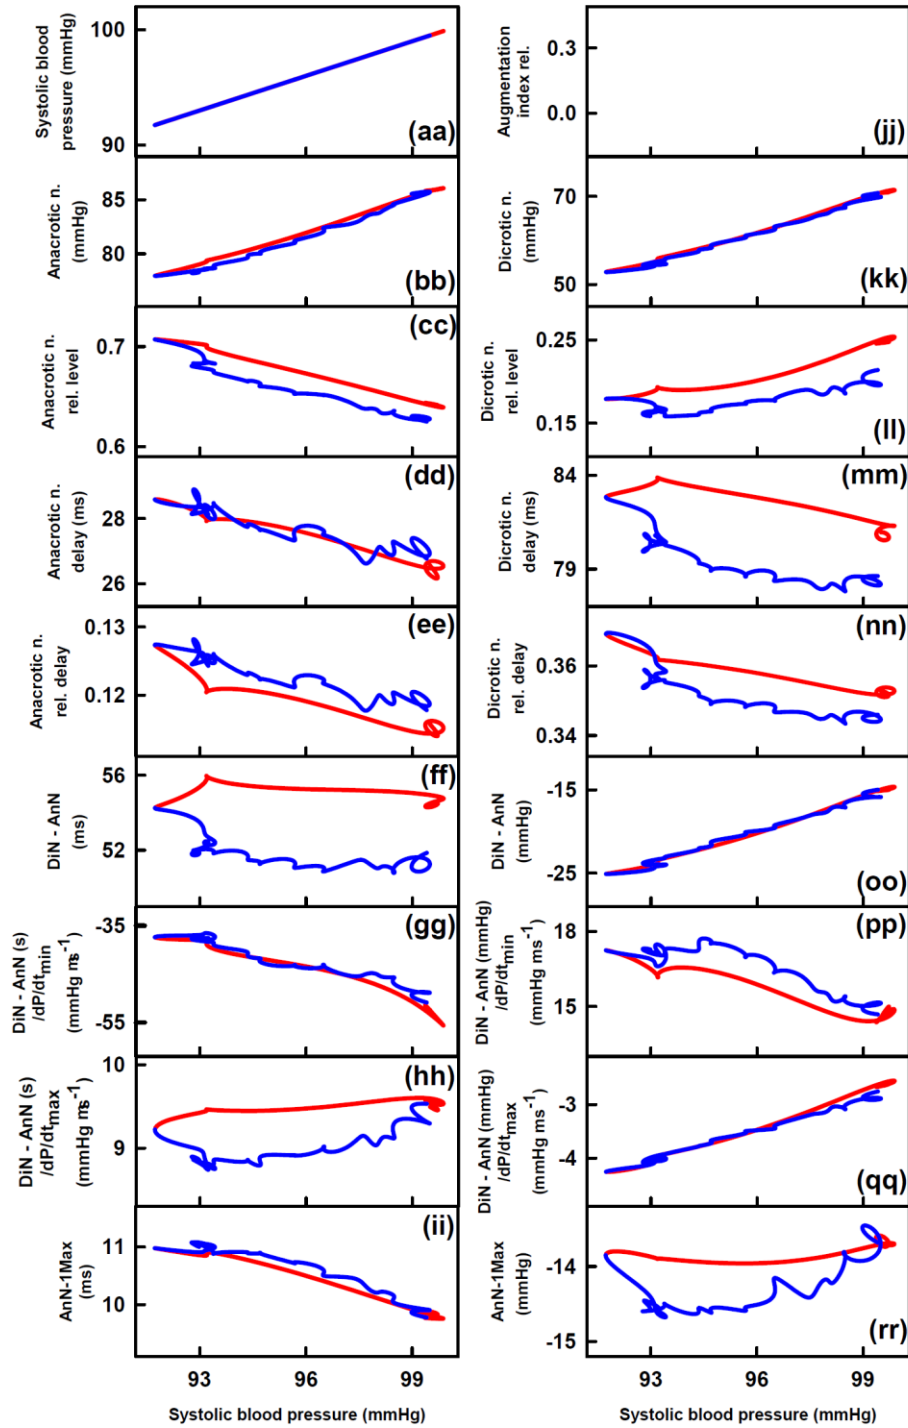

**Figure S2C** Relationships of HPs to systolic BP after administrations of  $32 \text{ nmol kg}^{-1}$  GSNO. The red line represents the decrease of the systolic BP from the control BP to the lowest BP and blue line represents the increase of the systolic BP from the lowest systolic BP to the control systolic BP (Figure 3A(a) or 3A(aa)).

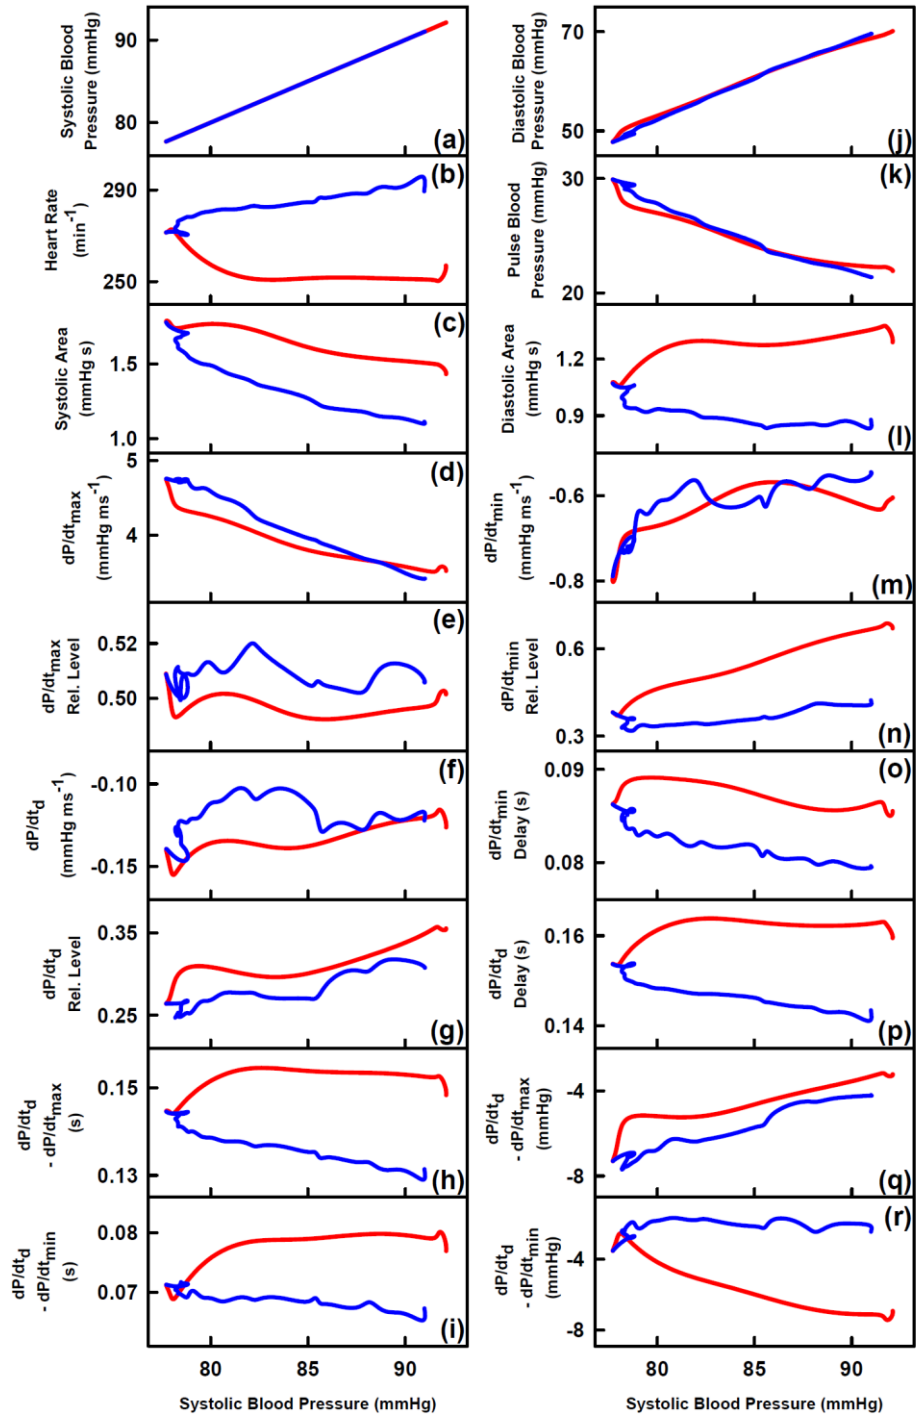

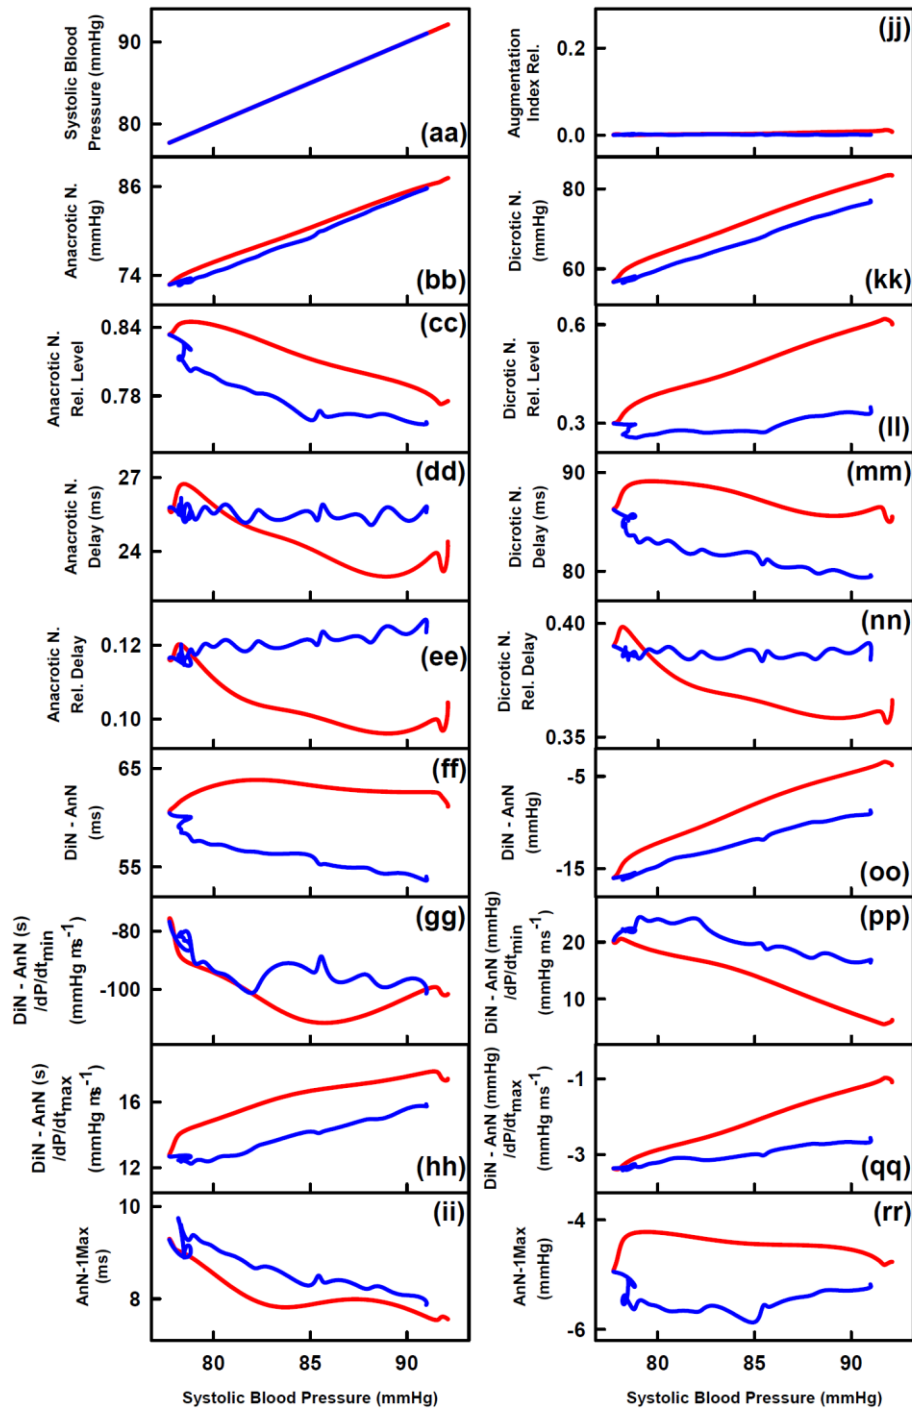

**Figure S2D** Relationships of HPs to systolic BP after administrations of  $32 \text{ nmol kg}^{-1}$  GSNO. The red line represents the decrease of the systolic BP from the control BP to the lowest BP and blue line represents the increase of the systolic BP from the lowest systolic BP to the control systolic BP (Figure 3A(a) or 3A(aa)).

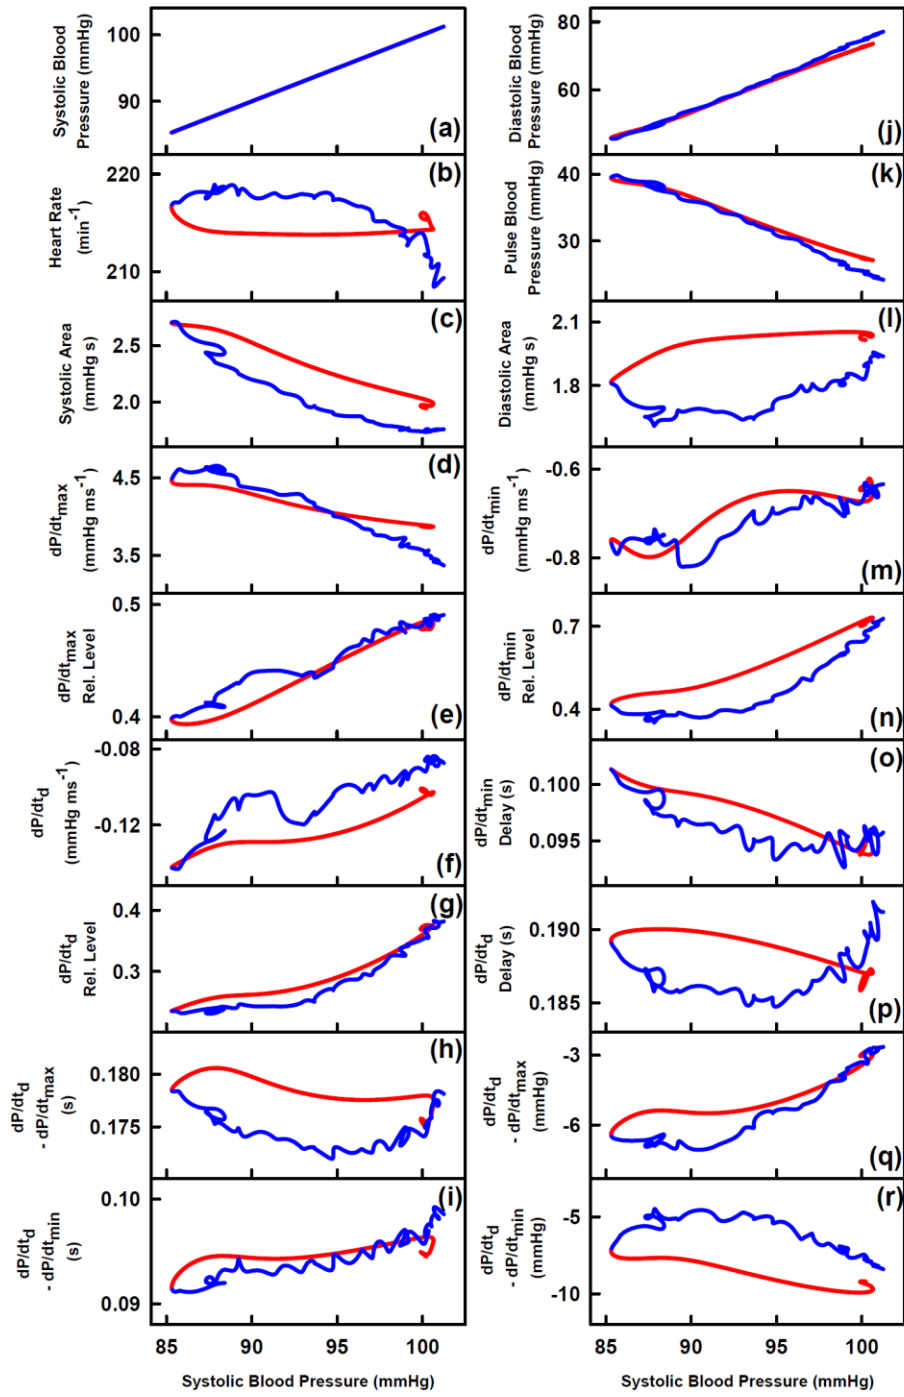

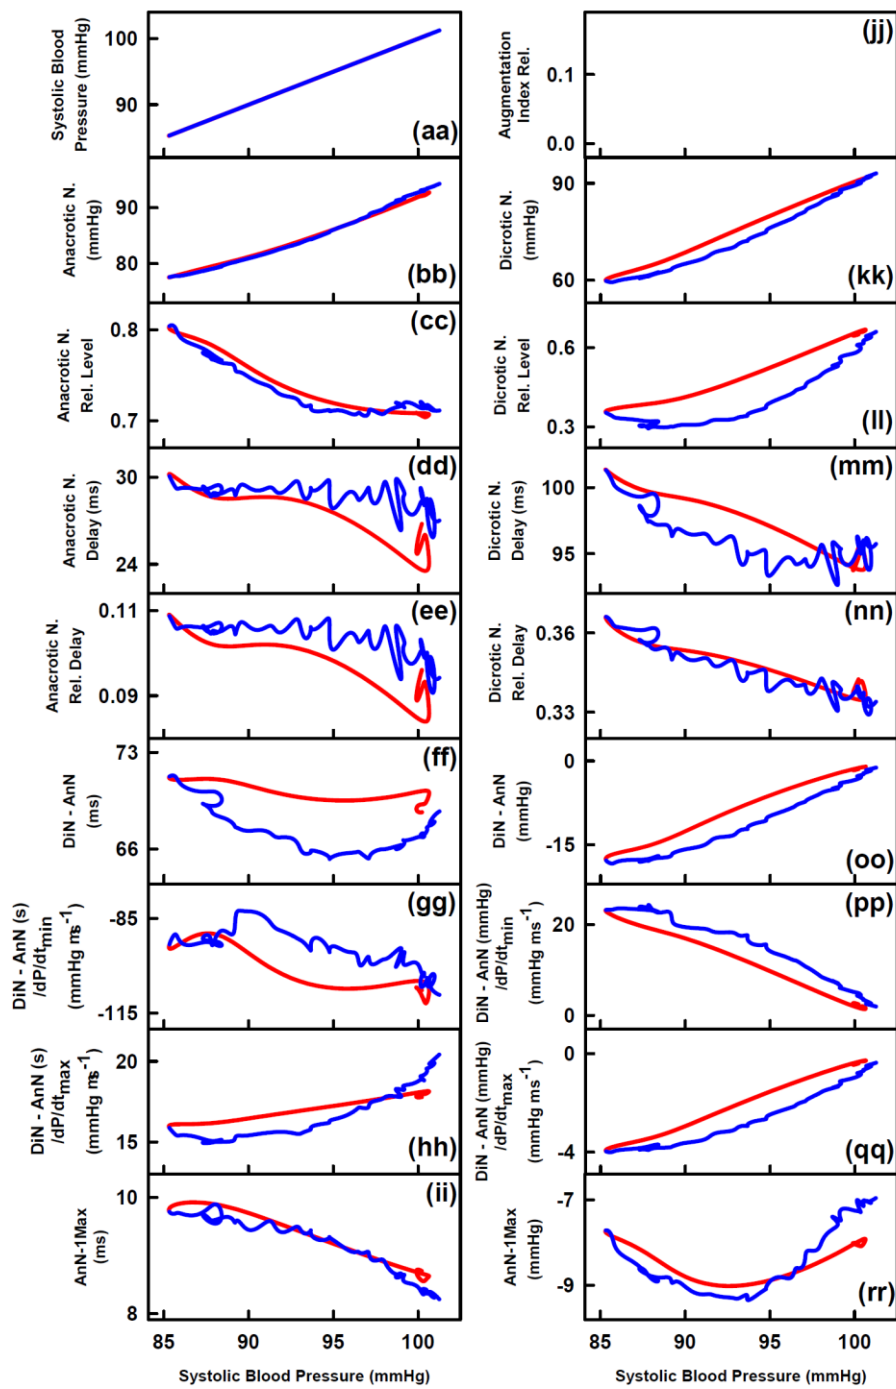

**Figure S2E** Relationships of HPs to systolic BP after administrations of  $32 \text{ nmol kg}^{-1}$  GSNO. The red line represents the decrease of the systolic BP from the control BP to the lowest BP and blue line represents the increase of the systolic BP from the lowest systolic BP to the control systolic BP (Figure 3A(a) or 3A(aa)).

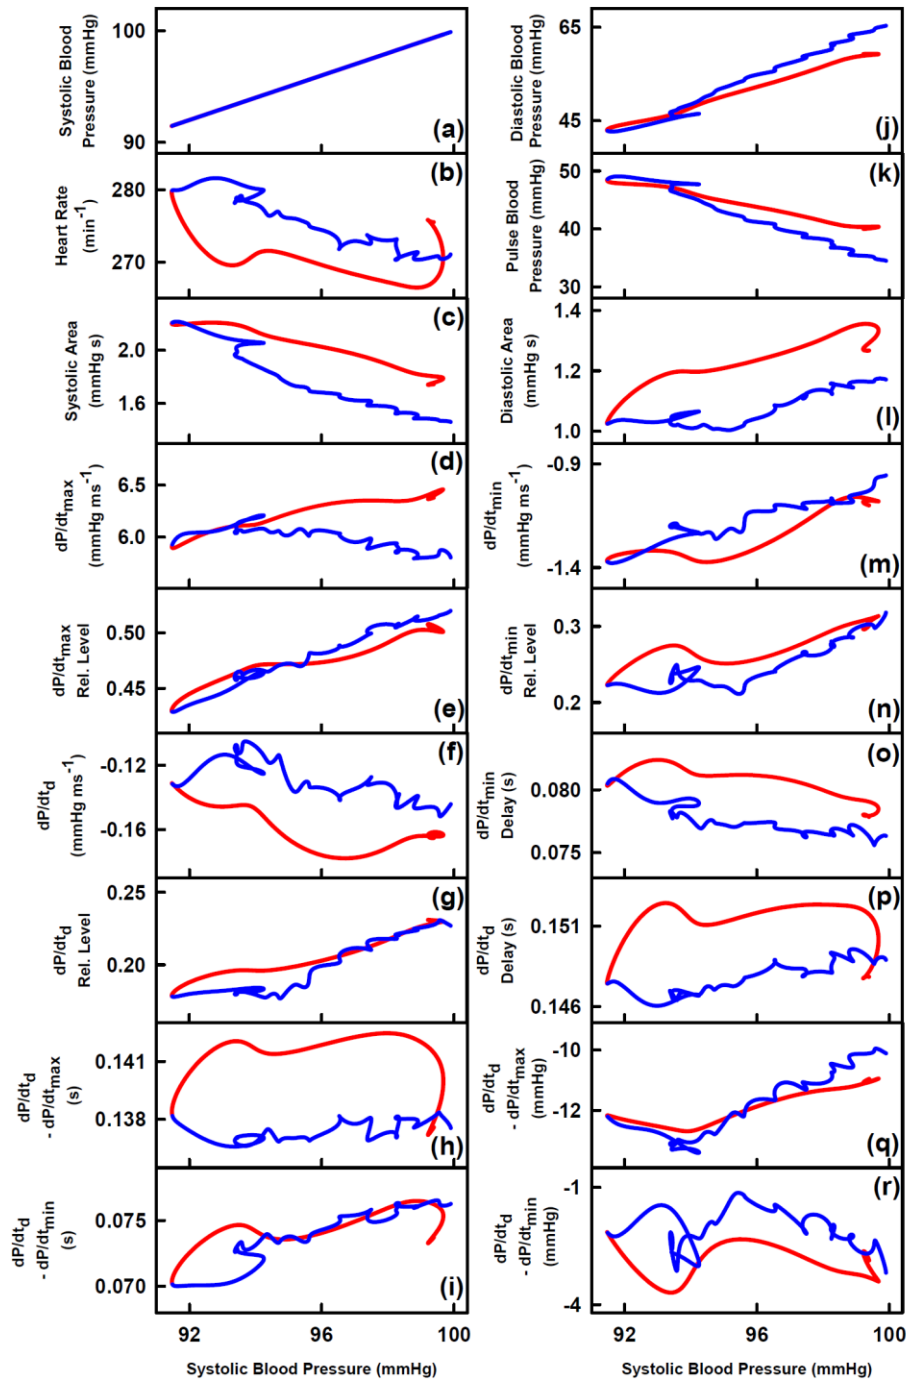

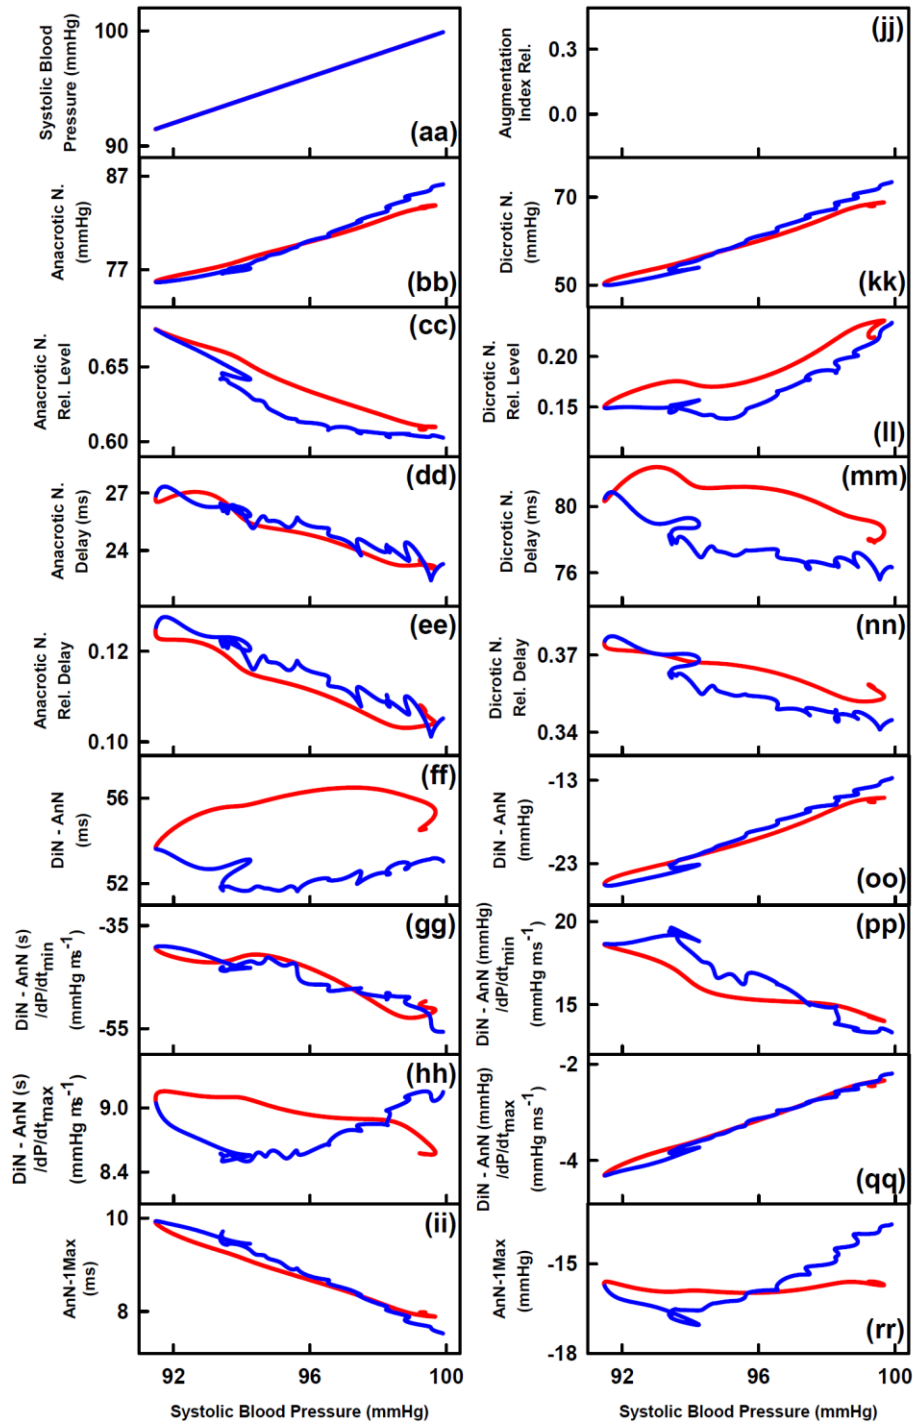

**Figure S2F** Relationships of HPs to systolic BP after administrations of  $32 \text{ nmol kg}^{-1}$  GSNO. The red line represents the decrease of the systolic BP from the control BP to the lowest BP and blue line represents the increase of the systolic BP from the lowest systolic BP to the control systolic BP (Figure 3A(a) or 3A(aa)).

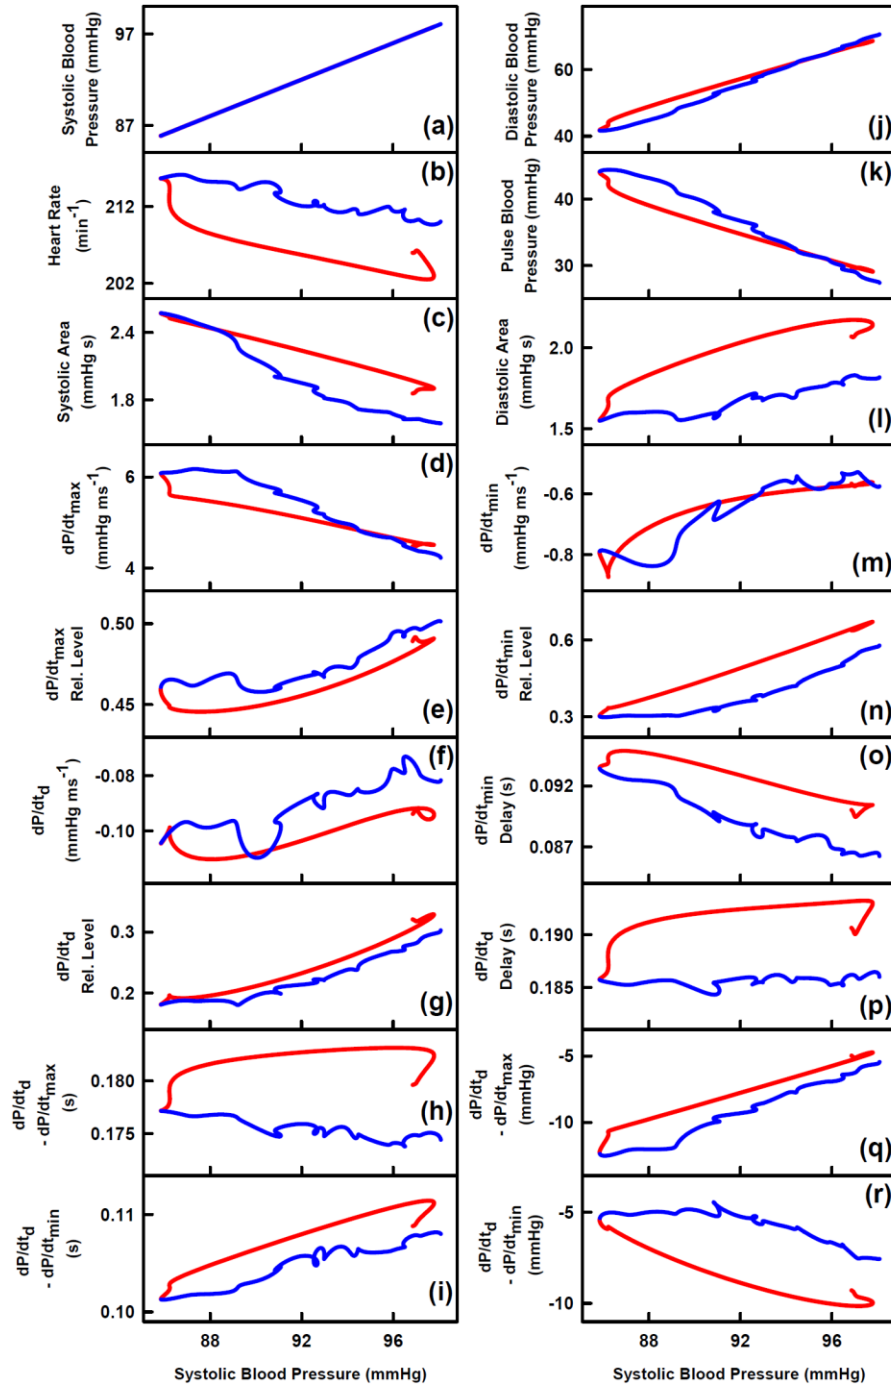



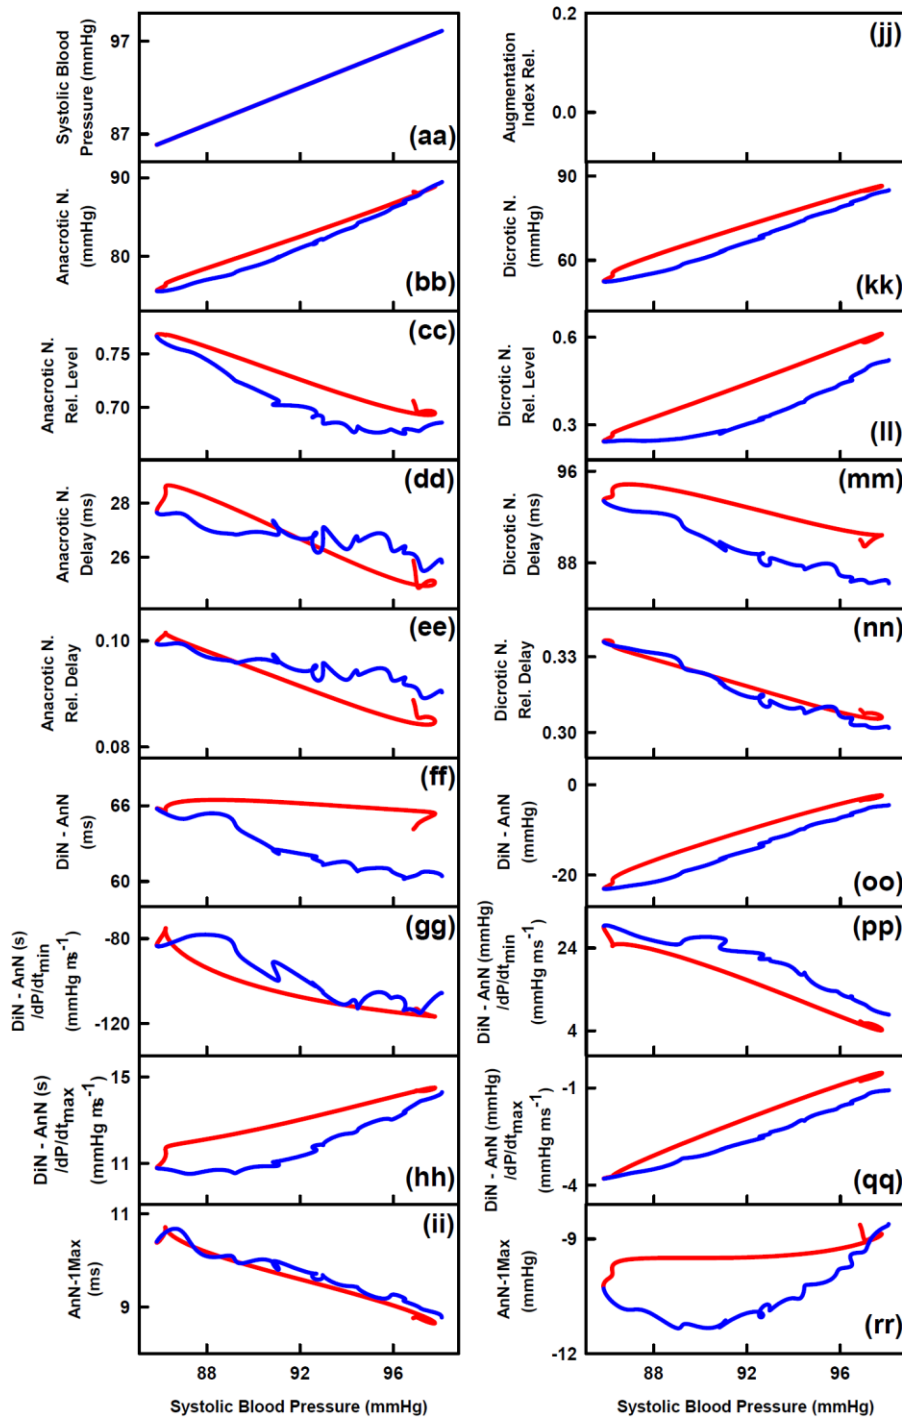

**Figure S2G** Relationships of HPs to systolic BP after administrations of  $32 \text{ nmol kg}^{-1}$  GSNO. The red line represents the decrease of the systolic BP from the control BP to the lowest BP and blue line represents the increase of the systolic BP from the lowest systolic BP to the control systolic BP (Figure 3A(a) or 3A(aa)).

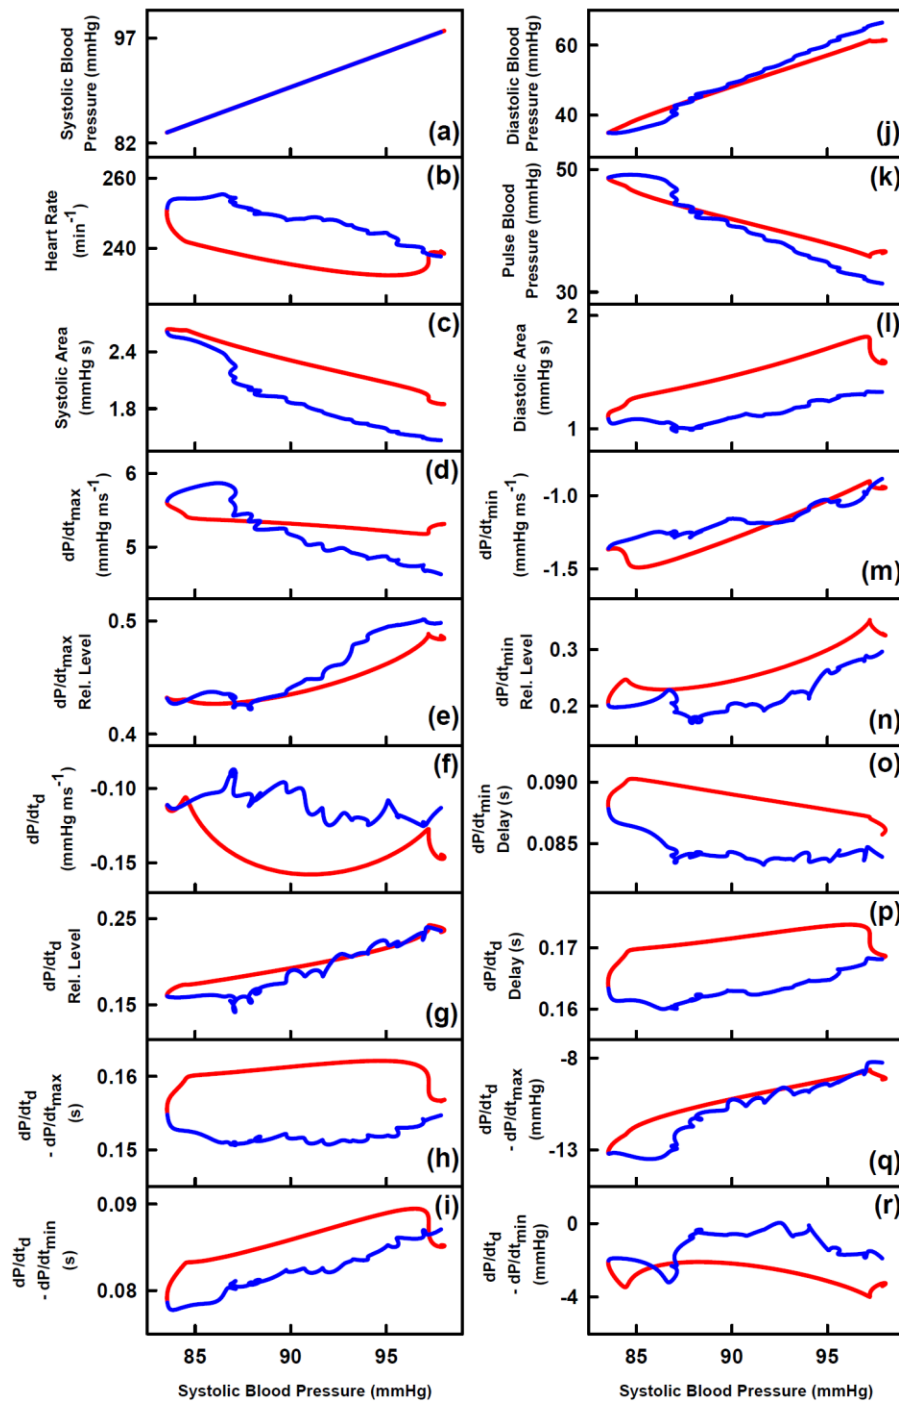

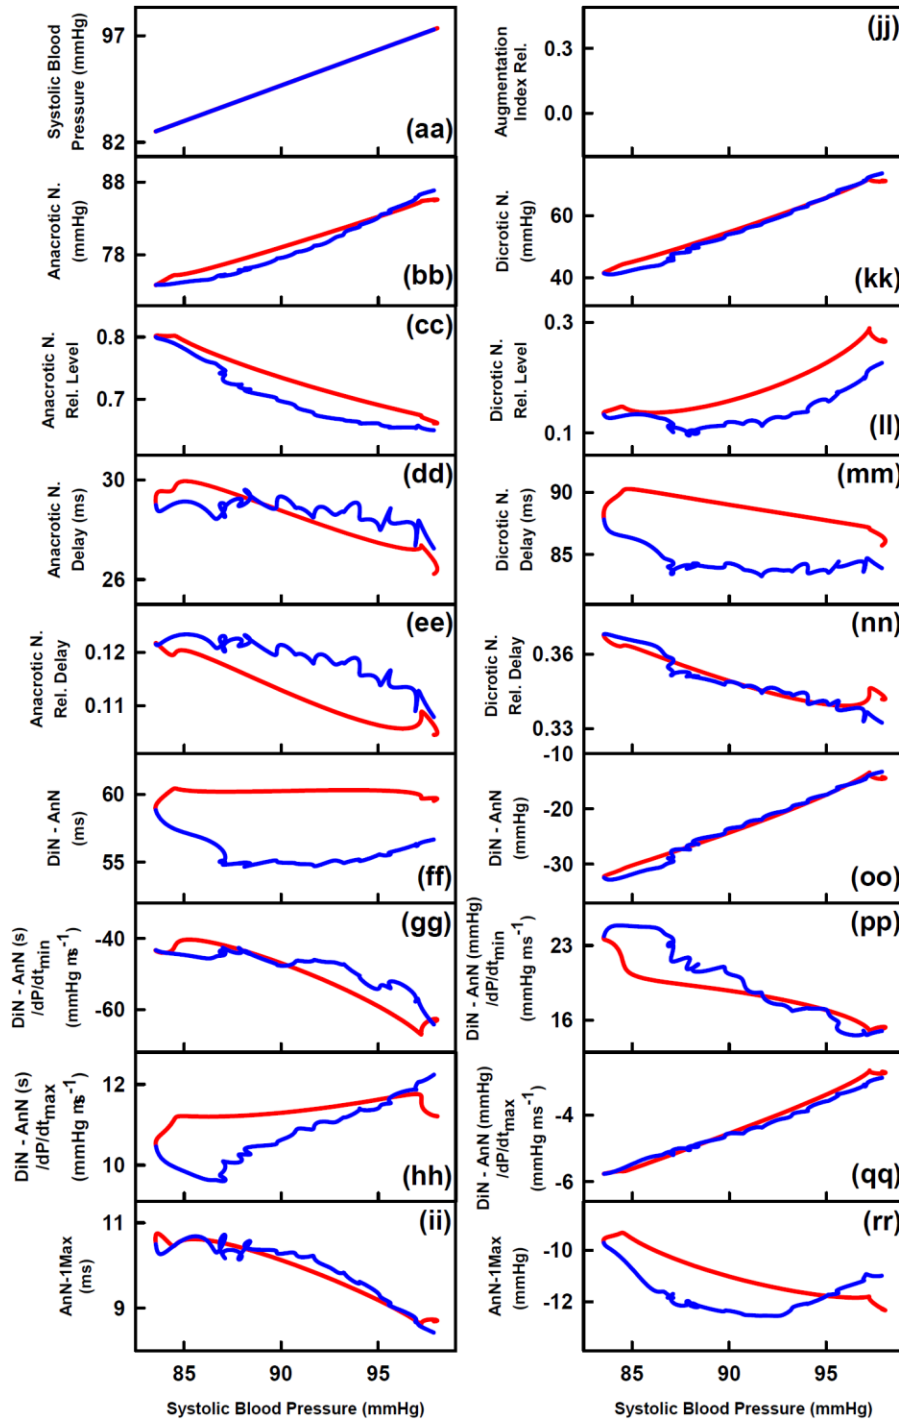

**Figure S2H** Relationships of HPs to systolic BP after administrations of 32 nmol kg<sup>-1</sup> GSNO. The red line represents the decrease of the systolic BP from the control BP to the lowest BP and blue line represents the increase of the systolic BP from the lowest systolic BP to the control systolic BP (Figure 3A(a) or 3A(aa)).

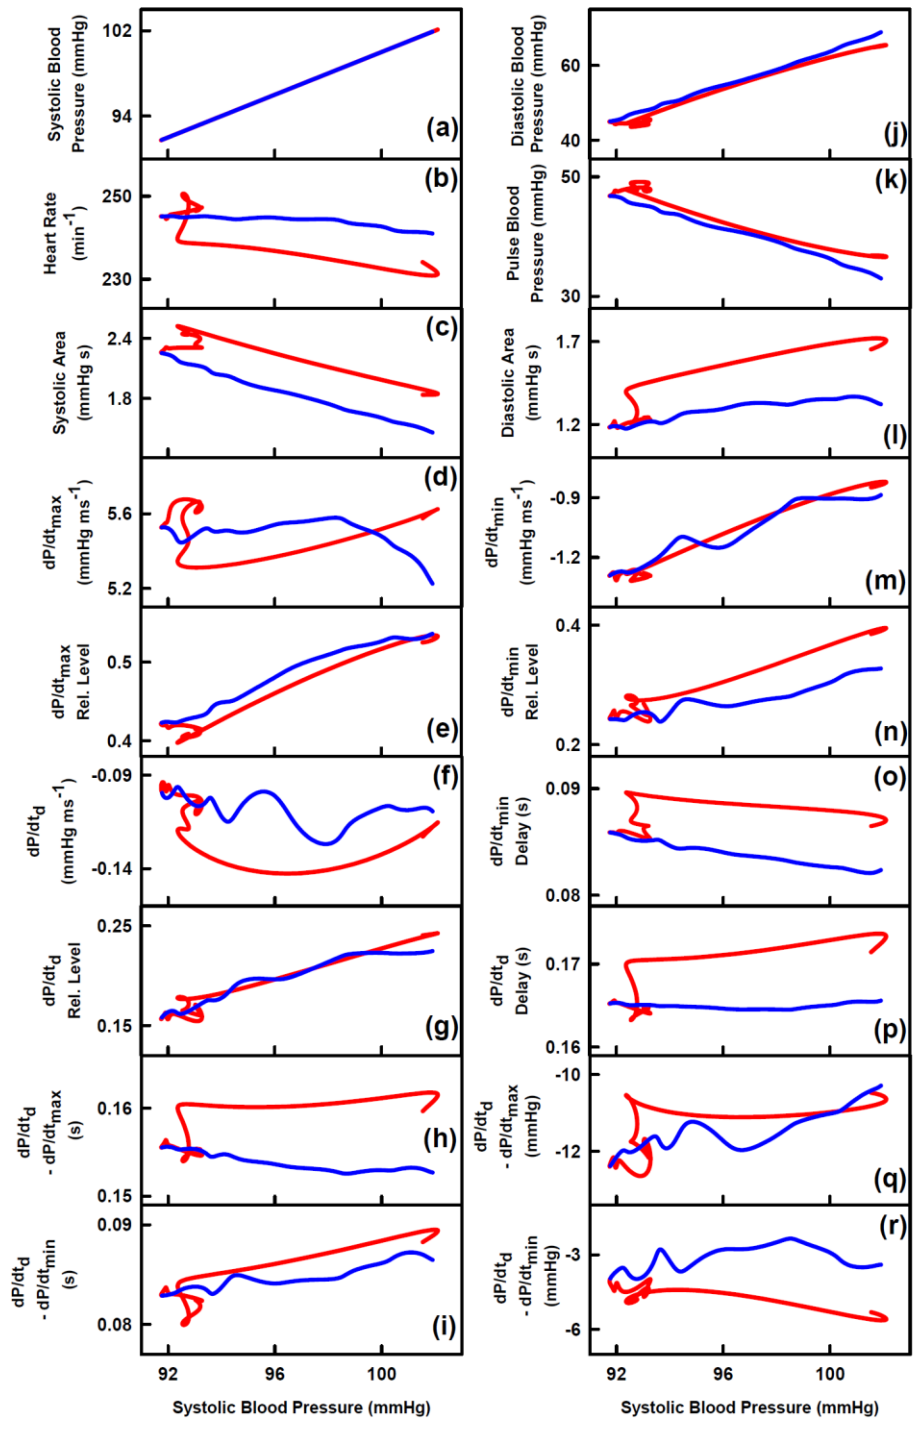

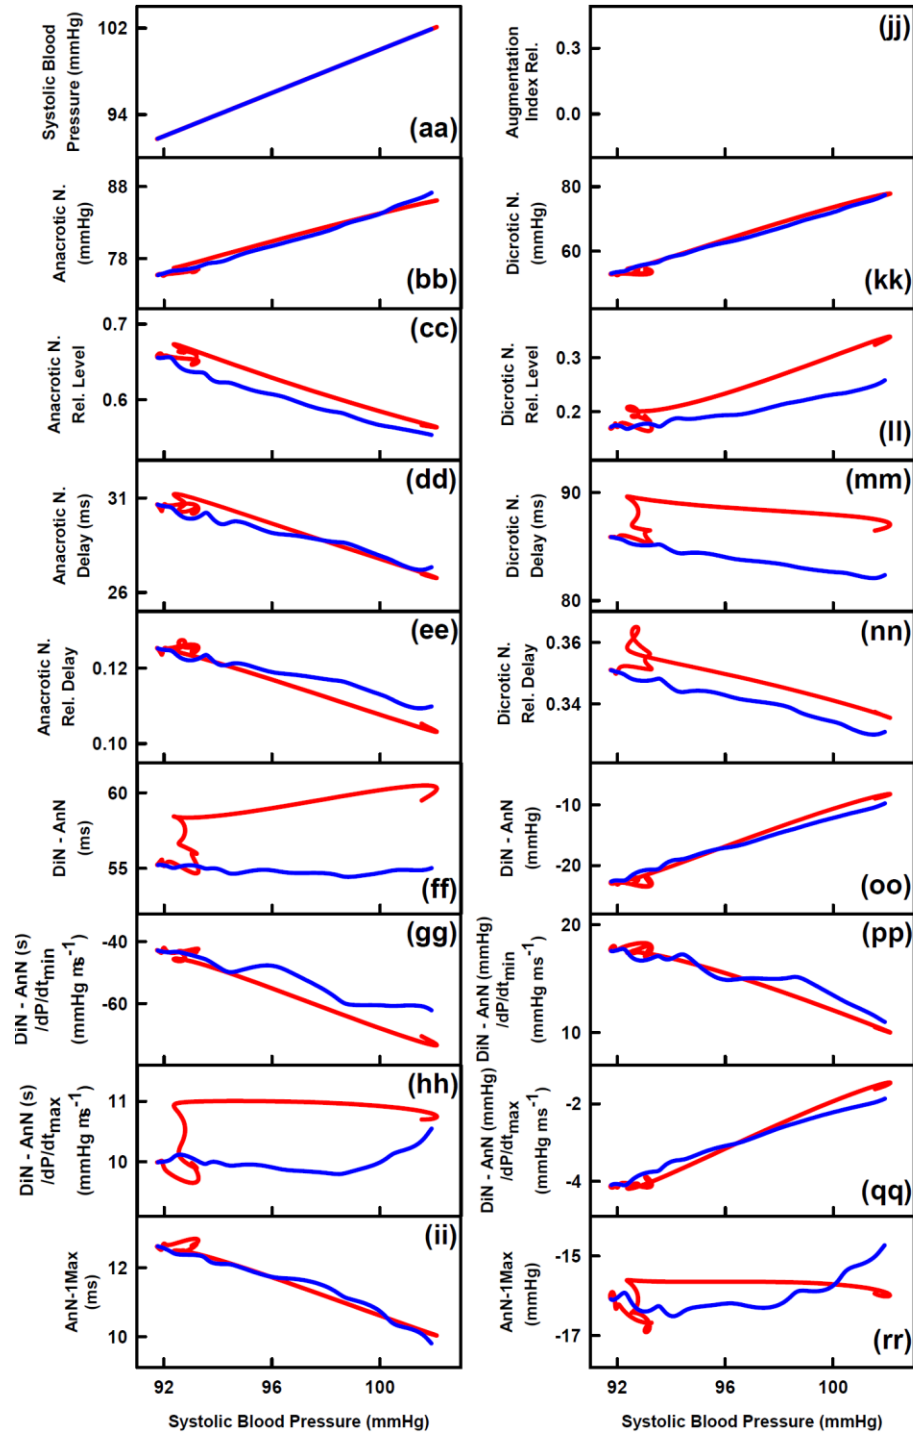

**Figure S2I** Relationships of HPs to systolic BP after administrations of  $32 \text{ nmol kg}^{-1}$  GSNO. The red line represents the decrease of the systolic BP from the control BP to the lowest BP and blue line represents the increase of the systolic BP from the lowest systolic BP to the control systolic BP (Figure 3A(a) or 3A(aa)).
